# Supplementary material for: Deacclimation-Induced Changes of Photosynthetic Efficiency, Brassinosteroid Homeostasis and BRI1 Expression in Winter Oilseed Rape (Brassica napus L.)—Relation to Frost Tolerance
Source: MDPI journal article supplement (doi:10.3390/ijms23095224), 2022-05-07
Supplement: s1 [file s1]

**Table S3.** Statistical analysis of values of characteristic points of DF curves measured for oilseed rape leaves and presented on figure 7. Oilseed rape plants of cultivar Feliks, Pantheon, President and Rokas were not acclimated (NA), cold acclimated (CA) and deacclimated (DA). Average values  $\pm$ SD marked with the same letters did not differ significantly at  $p \leq 0.05$  according to Duncan's test.

| Treatment    | I <sub>1</sub>     | I <sub>2</sub>     | D <sub>2</sub>    | I <sub>1</sub> /I <sub>2</sub> | (I <sub>1</sub> -D <sub>2</sub> )/D <sub>2</sub> |
|--------------|--------------------|--------------------|-------------------|--------------------------------|--------------------------------------------------|
| Feliks NA    | 19100 $\pm$ 882 a  | 4301 $\pm$ 1892 a  | 1602 $\pm$ 810 a  | 5.3 $\pm$ 2.3 a                | 14.4 $\pm$ 8.1 a                                 |
| Feliks CA    | 25278 $\pm$ 3945 b | 5199 $\pm$ 2702 a  | 3338 $\pm$ 1491 b | 6.2 $\pm$ 3.1 a                | 8.2 $\pm$ 4.6 b                                  |
| Feliks DA    | 15968 $\pm$ 2005 c | 3452 $\pm$ 2267 a  | 863 $\pm$ 150 c   | 7.5 $\pm$ 5.5 a                | 18.2 $\pm$ 4.9 a                                 |
| Pantheon NA  | 20114 $\pm$ 602 a  | 3503 $\pm$ 2321 a  | 1198 $\pm$ 169 a  | 8.1 $\pm$ 4.1 a                | 16.3 $\pm$ 2.3 a                                 |
| Pantheon CA  | 32204 $\pm$ 3972 b | 10604 $\pm$ 6322 b | 2180 $\pm$ 553 b  | 4.1 $\pm$ 2.3 a                | 14.5 $\pm$ 3.8 a                                 |
| Pantheon DA  | 16502 $\pm$ 2077 c | 3443 $\pm$ 2259 a  | 991 $\pm$ 217 a   | 7.1 $\pm$ 4.2 a                | 16.5 $\pm$ 4.8 a                                 |
| President NA | 20758 $\pm$ 1500 a | 4371 $\pm$ 2943 a  | 1369 $\pm$ 376 a  | 7.2 $\pm$ 4.6 a                | 15.3 $\pm$ 4.6 a                                 |
| President CA | 28892 $\pm$ 5533 b | 8739 $\pm$ 6833 b  | 1768 $\pm$ 223 b  | 5.6 $\pm$ 3.5 a                | 15.4 $\pm$ 3.0 a                                 |
| President DA | 15472 $\pm$ 2660 c | 2278 $\pm$ 1516 c  | 1144 $\pm$ 425 a  | 10.1 $\pm$ 6.2 a               | 14.7 $\pm$ 7.6 a                                 |
| Rokas NA     | 15096 $\pm$ 961 a  | 3300 $\pm$ 2219 a  | 956 $\pm$ 247 a   | 6.9 $\pm$ 4.6 a                | 15.5 $\pm$ 3.3 a                                 |
| Rokas CA     | 22298 $\pm$ 3949 b | 4388 $\pm$ 1949 a  | 2594 $\pm$ 431 b  | 5.7 $\pm$ 1.9 a                | 7.9 $\pm$ 2.4 b                                  |
| Rokas DA     | 16644 $\pm$ 886 a  | 2331 $\pm$ 1494 a  | 910 $\pm$ 202 a   | 10.1 $\pm$ 5.7 a               | 17.9 $\pm$ 3.3 a                                 |
