# Supplementary material for: Deacclimation-Induced Changes of Photosynthetic Efficiency, Brassinosteroid Homeostasis and BRI1 Expression in Winter Oilseed Rape (Brassica napus L.)—Relation to Frost Tolerance
Source: MDPI journal article supplement (doi:10.3390/ijms23095224), 2022-05-07
Supplement: s1 [file s1]

**Table S1.** Values of selected parameters of chlorophyll *a* fluorescence (Photosystem II efficiency) of non-acclimated (NA), cold-acclimated (CA) and deacclimated (DA) plants of oilseed rape (ten cultivars). *Average values  $\pm$ SD marked with the same letters did not differ significantly at  $p \leq 0.05$  according to Duncan's test,  $n=15$ .*

| Treatment    | Fv/Fm              | ABS/RC             | TRo/RC            | ETo/RC            | DIo/RC             | ABS/CSm             | TRo/CSm            | ETo/CSm            | DIo/CSm          | P.I. <sub>ABS</sub> |
|--------------|--------------------|--------------------|-------------------|-------------------|--------------------|---------------------|--------------------|--------------------|------------------|---------------------|
| Birdy NA     | 0.826 $\pm$ 0.01 a | 1.04 $\pm$ 0.04 b  | 0.86 $\pm$ 0.04 b | 0.58 $\pm$ 0.03 b | 0.18 $\pm$ 0.01 b  | 27783 $\pm$ 793 a   | 22961 $\pm$ 751 a  | 15676 $\pm$ 848 a  | 4823 $\pm$ 161 b | 10.05 $\pm$ 1.57 a  |
| Birdy CA     | 0.711 $\pm$ 0.06 b | 1.44 $\pm$ 0.34 a  | 1.01 $\pm$ 0.19 a | 0.51 $\pm$ 0.03 c | 0.43 $\pm$ 0.17 b  | 23080 $\pm$ 5330 b  | 16645 $\pm$ 4954 c | 8634 $\pm$ 2923 c  | 6435 $\pm$ 916 a | 2.45 $\pm$ 1.79 b   |
| Birdy DA     | 0.806 $\pm$ 0.01 c | 1.09 $\pm$ 0.12 b  | 0.88 $\pm$ 0.08 b | 0.62 $\pm$ 0.04 a | 0.21 $\pm$ 0.04 a  | 24509 $\pm$ 1509 b  | 19773 $\pm$ 1424 b | 13956 $\pm$ 1335 b | 4736 $\pm$ 312 b | 9.66 $\pm$ 2.54 a   |
| Bojan NA     | 0.822 $\pm$ 0.01 a | 1.01 $\pm$ 0.07 b  | 0.83 $\pm$ 0.05 b | 0.59 $\pm$ 0.02 a | 0.18 $\pm$ 0.02 b  | 27099 $\pm$ 1553 a  | 22291 $\pm$ 1388 a | 15943 $\pm$ 1183 a | 4808 $\pm$ 264 b | 12.12 $\pm$ 3.33 a  |
| Bojan CA     | 0.726 $\pm$ 0.11 b | 1.61 $\pm$ 1.07 a  | 1.06 $\pm$ 0.33 a | 0.50 $\pm$ 0.08 b | 0.54 $\pm$ 0.79 a  | 25450 $\pm$ 5352 ab | 18914 $\pm$ 5551 b | 9822 $\pm$ 3789 c  | 6536 $\pm$ 993 a | 3.20 $\pm$ 2.64 c   |
| Bojan DA     | 0.784 $\pm$ 0.03 a | 1.24 $\pm$ 0.26 ab | 0.97 $\pm$ 0.16 a | 0.62 $\pm$ 0.04 a | 0.27 $\pm$ 0.09 ab | 23803 $\pm$ 1935 b  | 18647 $\pm$ 1577 b | 12138 $\pm$ 1788 b | 5156 $\pm$ 815 b | 6.67 $\pm$ 3.46 b   |
| Darcy NA     | 0.827 $\pm$ 0.01 a | 1.08 $\pm$ 0.06 b  | 0.89 $\pm$ 0.04 a | 0.65 $\pm$ 0.04 a | 0.19 $\pm$ 0.02 b  | 27700 $\pm$ 1411 a  | 22914 $\pm$ 1328 a | 16735 $\pm$ 953 a  | 4786 $\pm$ 169 b | 12.16 $\pm$ 1.59 a  |
| Darcy CA     | 0.746 $\pm$ 0.08 b | 1.33 $\pm$ 0.47 a  | 0.96 $\pm$ 0.22 a | 0.53 $\pm$ 0.05 b | 0.37 $\pm$ 0.27 a  | 25462 $\pm$ 4296 b  | 19268 $\pm$ 4906 b | 11488 $\pm$ 4200 c | 6194 $\pm$ 883 a | 5.04 $\pm$ 3.77 b   |
| Darcy DA     | 0.807 $\pm$ 0.03 a | 1.15 $\pm$ 0.23 ab | 0.93 $\pm$ 0.14 a | 0.64 $\pm$ 0.05 a | 0.23 $\pm$ 0.09 b  | 26274 $\pm$ 1638 ab | 21227 $\pm$ 1758 a | 14948 $\pm$ 2221 b | 5047 $\pm$ 645 b | 10.03 $\pm$ 4.08 a  |
| Feliks NA    | 0.824 $\pm$ 0.02 a | 1.11 $\pm$ 0.10 a  | 0.92 $\pm$ 0.07 a | 0.65 $\pm$ 0.04 a | 0.20 $\pm$ 0.04 b  | 27811 $\pm$ 1605 a  | 22939 $\pm$ 1661 a | 16430 $\pm$ 1870 a | 4871 $\pm$ 368 b | 11.26 $\pm$ 3.08 a  |
| Feliks CA    | 0.763 $\pm$ 0.05 b | 1.23 $\pm$ 0.37 a  | 0.92 $\pm$ 0.20 a | 0.52 $\pm$ 0.06 b | 0.31 $\pm$ 0.18 a  | 26026 $\pm$ 3502 b  | 19981 $\pm$ 3711 b | 11672 $\pm$ 2873 c | 6044 $\pm$ 928 a | 5.01 $\pm$ 3.39 c   |
| Feliks DA    | 0.805 $\pm$ 0.02 a | 1.15 $\pm$ 0.15 a  | 0.92 $\pm$ 0.10 a | 0.63 $\pm$ 0.04 a | 0.23 $\pm$ 0.05 b  | 25789 $\pm$ 1244 b  | 20771 $\pm$ 1159 b | 14241 $\pm$ 1278 b | 5018 $\pm$ 404 b | 8.44 $\pm$ 2.86 b   |
| Finley NA    | 0.822 $\pm$ 0.01 a | 1.08 $\pm$ 0.12 a  | 0.89 $\pm$ 0.09 a | 0.61 $\pm$ 0.05 a | 0.19 $\pm$ 0.03 b  | 26049 $\pm$ 1999 a  | 21418 $\pm$ 1781 a | 14712 $\pm$ 1703 a | 4631 $\pm$ 401 b | 10.20 $\pm$ 3.31 a  |
| Finley CA    | 0.775 $\pm$ 0.03 b | 1.11 $\pm$ 0.25 a  | 0.86 $\pm$ 0.17 a | 0.48 $\pm$ 0.03 c | 0.26 $\pm$ 0.09 a  | 24425 $\pm$ 4102 ab | 19049 $\pm$ 3955 b | 10963 $\pm$ 3039 b | 5376 $\pm$ 318 a | 4.88 $\pm$ 2.36 b   |
| Finley DA    | 0.810 $\pm$ 0.01 a | 1.02 $\pm$ 0.07 a  | 0.83 $\pm$ 0.05 a | 0.58 $\pm$ 0.02 b | 0.19 $\pm$ 0.02 b  | 23891 $\pm$ 1744 b  | 19365 $\pm$ 1485 b | 13622 $\pm$ 1376 a | 4527 $\pm$ 332 b | 10.39 $\pm$ 3.04 a  |
| Graf NA      | 0.826 $\pm$ 0.01 a | 1.07 $\pm$ 0.05 b  | 0.88 $\pm$ 0.04 a | 0.61 $\pm$ 0.03 a | 0.19 $\pm$ 0.01 b  | 26979 $\pm$ 1386 a  | 22291 $\pm$ 1286 a | 15400 $\pm$ 1048 a | 4688 $\pm$ 196 b | 10.08 $\pm$ 1.57 a  |
| Graf CA      | 0.753 $\pm$ 0.05 c | 1.20 $\pm$ 0.20 a  | 0.90 $\pm$ 0.09 a | 0.52 $\pm$ 0.04 b | 0.31 $\pm$ 0.12 a  | 25344 $\pm$ 4126 ab | 19266 $\pm$ 4377 b | 11406 $\pm$ 3012 c | 6078 $\pm$ 509 a | 4.37 $\pm$ 2.22 b   |
| Graf DA      | 0.801 $\pm$ 0.02 b | 1.15 $\pm$ 0.25 ab | 0.92 $\pm$ 0.17 a | 0.64 $\pm$ 0.05 a | 0.23 $\pm$ 0.08 b  | 24749 $\pm$ 1574 b  | 19828 $\pm$ 1298 b | 13950 $\pm$ 1415 b | 4921 $\pm$ 632 b | 9.67 $\pm$ 3.50 a   |
| Monolit NA   | 0.830 $\pm$ 0.01 a | 1.06 $\pm$ 0.08 b  | 0.88 $\pm$ 0.06 a | 0.63 $\pm$ 0.04 a | 0.18 $\pm$ 0.02 b  | 27204 $\pm$ 1228 a  | 22567 $\pm$ 1048 a | 16178 $\pm$ 1005 a | 4637 $\pm$ 276 b | 12.21 $\pm$ 3.50 a  |
| Monolit CA   | 0.750 $\pm$ 0.06 b | 1.31 $\pm$ 0.42 a  | 0.96 $\pm$ 0.22 a | 0.49 $\pm$ 0.04 b | 0.35 $\pm$ 0.21 a  | 26217 $\pm$ 3728 a  | 19852 $\pm$ 4142 b | 10735 $\pm$ 3734 b | 6365 $\pm$ 924 a | 3.78 $\pm$ 2.59 b   |
| Monolit DA   | 0.814 $\pm$ 0.02 a | 1.10 $\pm$ 0.18 b  | 0.89 $\pm$ 0.13 a | 0.62 $\pm$ 0.05 a | 0.21 $\pm$ 0.05 b  | 26485 $\pm$ 1863 a  | 21576 $\pm$ 1673 a | 15082 $\pm$ 1749 a | 4909 $\pm$ 449 b | 10.46 $\pm$ 4.23 a  |
| Pantheon NA  | 0.754 $\pm$ 0.21 a | 1.89 $\pm$ 2.69 a  | 0.88 $\pm$ 0.07 a | 0.62 $\pm$ 0.05 a | 1.01 $\pm$ 2.64 a  | 25527 $\pm$ 2180 b  | 19459 $\pm$ 5838 a | 13581 $\pm$ 4173 a | 6068 $\pm$ 4533a | 9.20 $\pm$ 3.75 a   |
| Pantheon CA  | 0.784 $\pm$ 0.04 a | 1.17 $\pm$ 0.26 a  | 0.91 $\pm$ 0.16 a | 0.55 $\pm$ 0.06 b | 0.26 $\pm$ 0.11 a  | 27648 $\pm$ 4017 a  | 21799 $\pm$ 4040 a | 13302 $\pm$ 2698 a | 5850 $\pm$ 545 a | 5.69 $\pm$ 2.74 b   |
| Pantheon DA  | 0.808 $\pm$ 0.02 a | 1.08 $\pm$ 0.20 a  | 0.87 $\pm$ 0.13 a | 0.60 $\pm$ 0.04 a | 0.21 $\pm$ 0.07 a  | 24775 $\pm$ 1634 b  | 20015 $\pm$ 1493 a | 14052 $\pm$ 1553 a | 4760 $\pm$ 528 a | 10.09 $\pm$ 3.10 a  |
| President NA | 0.797 $\pm$ 0.16 a | 1.34 $\pm$ 1.39 a  | 0.87 $\pm$ 0.05 a | 0.64 $\pm$ 0.07 a | 0.48 $\pm$ 1.41 a  | 26608 $\pm$ 5730 a  | 22058 $\pm$ 5024 a | 15879 $\pm$ 3630 a | 4550 $\pm$ 728 c | 11.61 $\pm$ 3.02 a  |
| President CA | 0.788 $\pm$ 0.04 c | 1.13 $\pm$ 0.27 a  | 0.88 $\pm$ 0.16 a | 0.52 $\pm$ 0.04 b | 0.25 $\pm$ 0.11 b  | 27566 $\pm$ 3035 a  | 21811 $\pm$ 3253ab | 13329 $\pm$ 3186 b | 5755 $\pm$ 686 a | 6.47 $\pm$ 3.31 c   |
| President DA | 0.807 $\pm$ 0.02 b | 1.14 $\pm$ 0.21 a  | 0.92 $\pm$ 0.14 a | 0.61 $\pm$ 0.04 a | 0.22 $\pm$ 0.06 ab | 26079 $\pm$ 1255 b  | 21037 $\pm$ 1099 b | 14267 $\pm$ 1564 b | 5042 $\pm$ 507 b | 8.80 $\pm$ 3.62 b   |
| Rokas NA     | 0.829 $\pm$ 0.01 a | 1.01 $\pm$ 0.03 b  | 0.84 $\pm$ 0.03 b | 0.60 $\pm$ 0.03 a | 0.17 $\pm$ 0.01 b  | 26253 $\pm$ 1201 a  | 21753 $\pm$ 1077 a | 15695 $\pm$ 850 a  | 4500 $\pm$ 158 c | 12.62 $\pm$ 1.99 a  |
| Rokas CA     | 0.739 $\pm$ 0.05 c | 1.37 $\pm$ 0.47 a  | 1.00 $\pm$ 0.27 a | 0.53 $\pm$ 0.05 b | 0.37 $\pm$ 0.21 a  | 24597 $\pm$ 4712 a  | 18328 $\pm$ 4414 b | 10128 $\pm$ 2792 c | 6268 $\pm$ 887 a | 3.40 $\pm$ 1.97 c   |
| Rokas DA     | 0.801 $\pm$ 0.02 b | 1.09 $\pm$ 0.16 b  | 0.87 $\pm$ 0.10 b | 0.61 $\pm$ 0.04 a | 0.22 $\pm$ 0.06 b  | 25097 $\pm$ 2117 a  | 20121 $\pm$ 1952ab | 14134 $\pm$ 1667 b | 4976 $\pm$ 448 b | 9.50 $\pm$ 3.19 b   |
