# Supplementary material for: Deacclimation-Induced Changes of Photosynthetic Efficiency, Brassinosteroid Homeostasis and BRI1 Expression in Winter Oilseed Rape (Brassica napus L.)—Relation to Frost Tolerance
Source: MDPI journal article supplement (doi:10.3390/ijms23095224), 2022-05-07
Supplement: s1 [file s1]

**Table S5.** Genes, sequence origins and the designed primers and probes used in the study.

| Gene name    | GenBank ID | Forward primer              | Reverse primer                    | Probe                       |
|--------------|------------|-----------------------------|-----------------------------------|-----------------------------|
| <i>BRI1</i>  | JX871217.1 | GATGTTCAAGCA<br>ATCCGGGAAAA | TCTTTCTTCATCCCGTC<br>GTTTTTTATGTA | FAM-TCGCTGTGAATTTCA-<br>NFQ |
| <i>Actin</i> | AF111812.1 | GCTATCCTCCGT<br>CTCGATCTC   | GTGGTGAACATGTACC<br>CTCTCT        | FAM-ACCTCACTGATTCCC-<br>NFQ |
