# Supplementary material for: Deacclimation-Induced Changes of Photosynthetic Efficiency, Brassinosteroid Homeostasis and BRI1 Expression in Winter Oilseed Rape (Brassica napus L.)—Relation to Frost Tolerance
Source: MDPI journal article supplement (doi:10.3390/ijms23095224), 2022-05-07
Supplement: s1 [file s1]

**Table S2.** Statistical analysis of values of typical transient points O, K, J, I and P of the chlorophyll *a* fluorescence induction curves presented on figure 3 A, C, E and G. Oilseed rape plants of cultivar Feliks, Pantheon, President and Rokas were not acclimated (NA), cold acclimated (CA) and deacclimated (DA). Average values  $\pm$ SD marked with the same letters did not differ significantly at  $p \leq 0.05$  according to Duncan's test.

| Treatment    | O                | K                 | J                  | I                  | P                  |
|--------------|------------------|-------------------|--------------------|--------------------|--------------------|
| Feliks NA    | 4998 $\pm$ 407 a | 6018 $\pm$ 525 a  | 11397 $\pm$ 956 a  | 14044 $\pm$ 1075 a | 27848 $\pm$ 1646 a |
| Feliks CA    | 6173 $\pm$ 973 b | 7486 $\pm$ 1433 b | 14227 $\pm$ 2632 b | 16692 $\pm$ 2549 b | 24589 $\pm$ 6640 b |
| Feliks DA    | 5131 $\pm$ 440 a | 6160 $\pm$ 665 a  | 11515 $\pm$ 1083 a | 14810 $\pm$ 1351 a | 25741 $\pm$ 1283 a |
| Pantheon NA  | 4788 $\pm$ 236 a | 5729 $\pm$ 374 a  | 11070 $\pm$ 889 a  | 14060 $\pm$ 1188 a | 25569 $\pm$ 2152 a |
| Pantheon CA  | 6020 $\pm$ 598 b | 7339 $\pm$ 1010 b | 14346 $\pm$ 2174 b | 17021 $\pm$ 2432 b | 27553 $\pm$ 4097 a |
| Pantheon DA  | 4871 $\pm$ 565 a | 5776 $\pm$ 892 a  | 10723 $\pm$ 1468 a | 14421 $\pm$ 1809 a | 24718 $\pm$ 1646 a |
| President NA | 4831 $\pm$ 142 a | 5751 $\pm$ 176 a  | 11152 $\pm$ 564 a  | 14073 $\pm$ 789 a  | 27703 $\pm$ 1196 a |
| President CA | 5920 $\pm$ 738 b | 7197 $\pm$ 1131 b | 14237 $\pm$ 2054 b | 16716 $\pm$ 2075 b | 27564 $\pm$ 3039 a |
| President DA | 5181 $\pm$ 552 a | 6259 $\pm$ 912 a  | 11812 $\pm$ 1637 a | 20720 $\pm$ 1967 c | 26070 $\pm$ 1255 a |
| Rokas NA     | 4605 $\pm$ 172 a | 5461 $\pm$ 259 a  | 10564 $\pm$ 827 a  | 13556 $\pm$ 1158 a | 26217 $\pm$ 1206 a |
| Rokas CA     | 6456 $\pm$ 988 b | 7895 $\pm$ 1711 b | 14468 $\pm$ 3526 b | 16831 $\pm$ 3753 b | 23544 $\pm$ 6869 b |
| Rokas DA     | 5030 $\pm$ 478 c | 5899 $\pm$ 695 a  | 10618 $\pm$ 1205 a | 14309 $\pm$ 1445 a | 24241 $\pm$ 2116 a |
